# Supplementary material for: Altered Cellular Immunity and Differentially Expressed Immune-Related Genes in Patients With Systemic Sclerosis–Associated Pulmonary Arterial Hypertension
Source: PubMed Central journal article supplement (PMC9159786; doi:10.3389/fimmu.2022.868983), 2022-05-18
Supplement: DataSheet_1.pdf [file DataSheet_1.pdf]

## Supplementary Material

### 1.1 Supplementary Figures

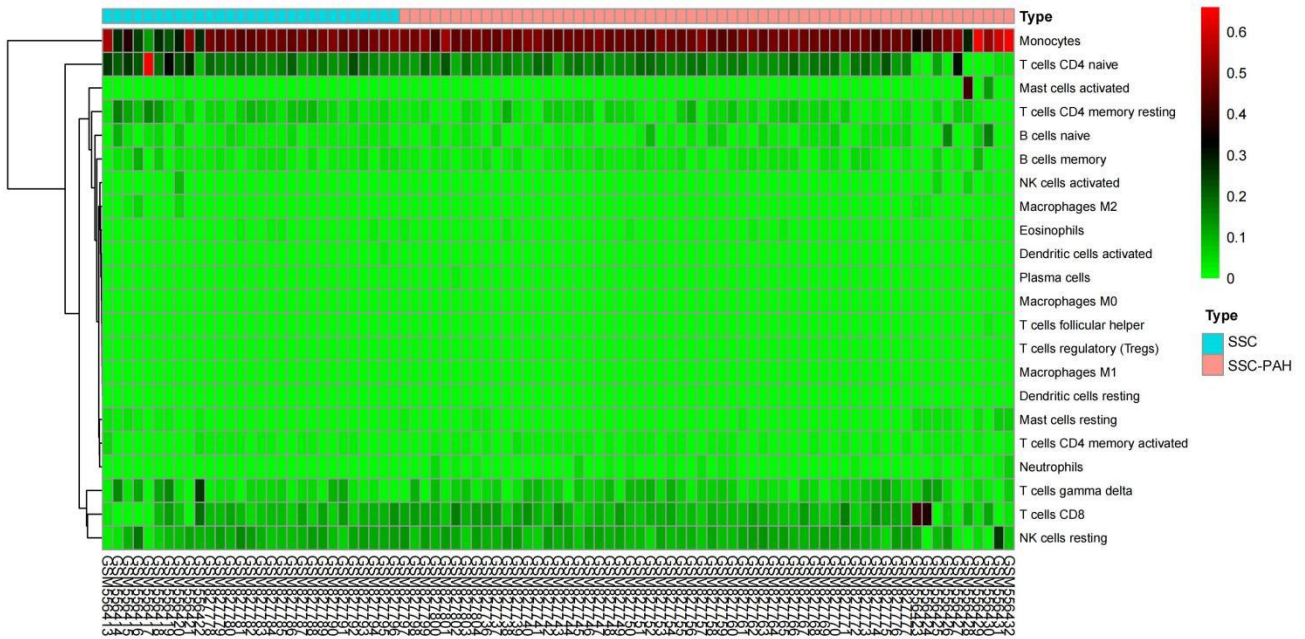

**Supplementary Figure 1. The distribution of 22 immune cells in 69 filtered gene matrix. Red indicates higher immune infiltration expression, and green indicates lower expression.**

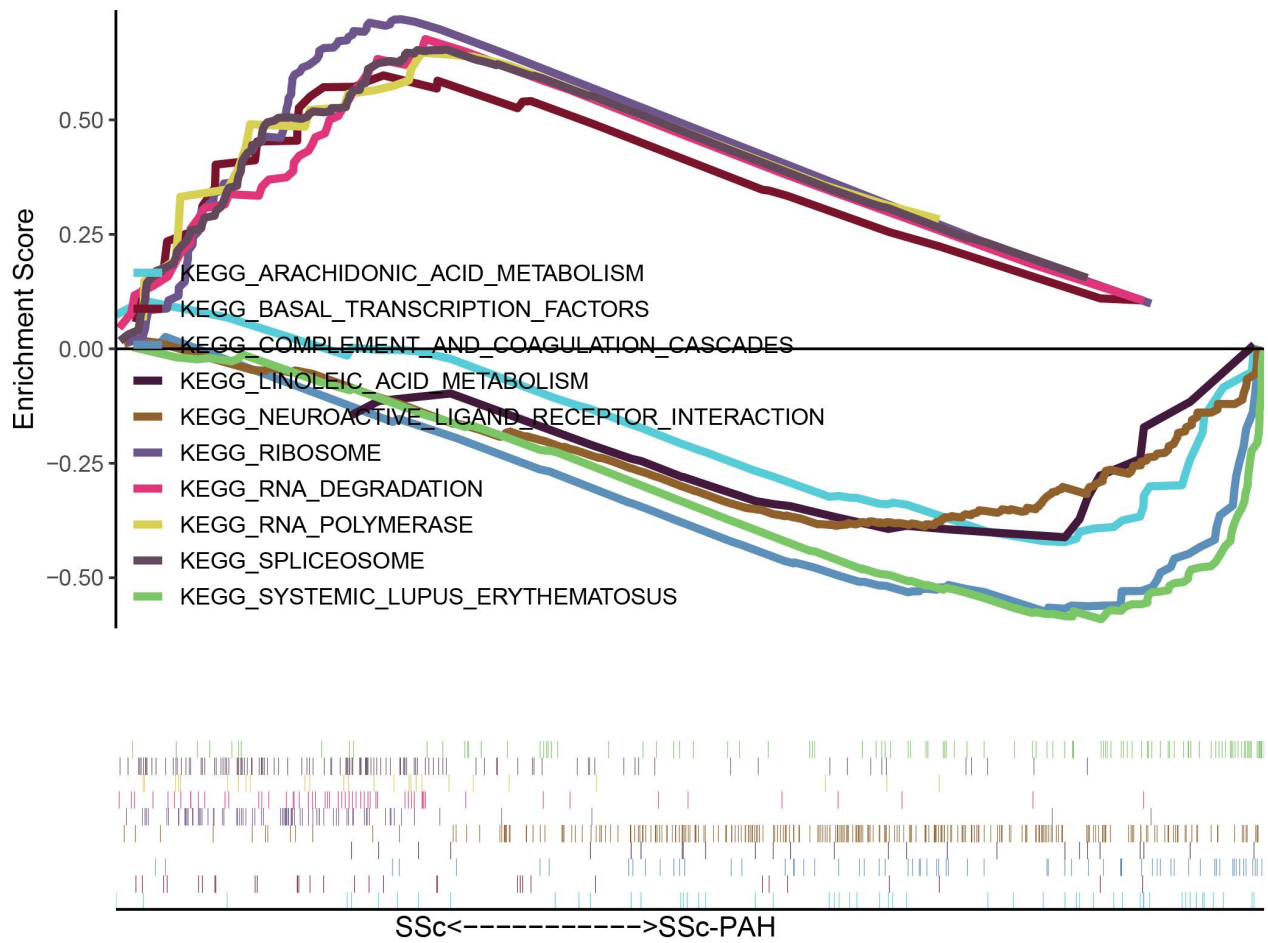

**Supplementary Figure 2.**The result of GSEA analysis between SSc and SSc-PAH groups.

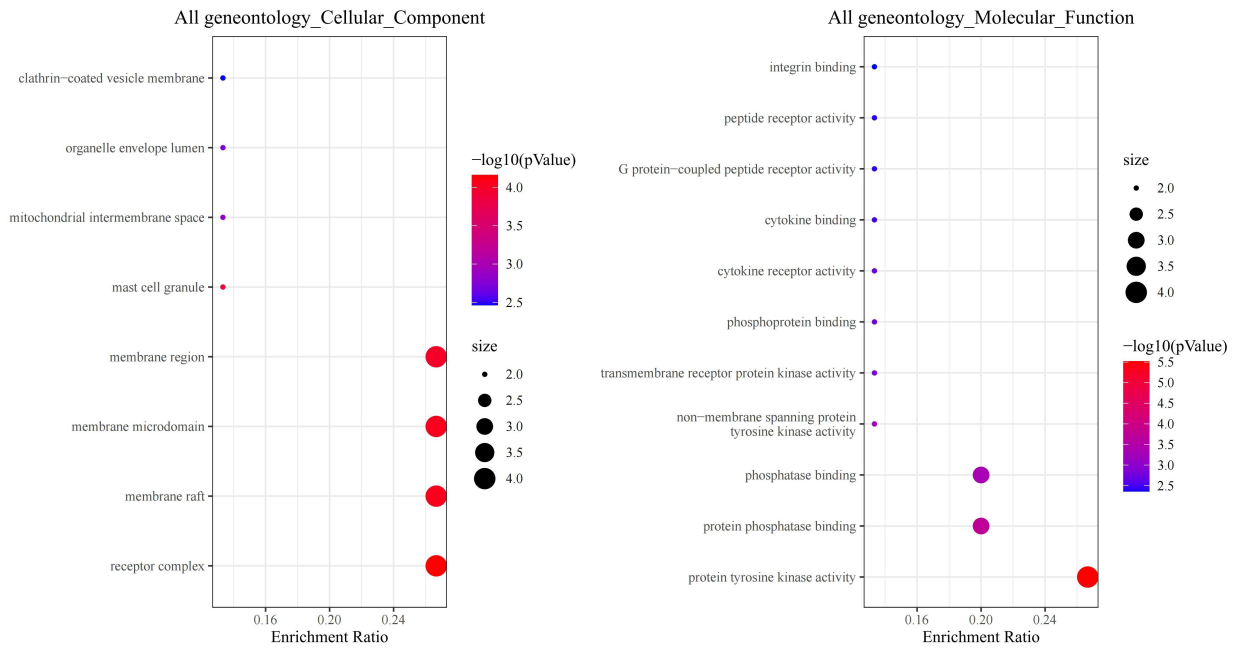

**Supplementary Figure 3.** The Enriched GO- Cellular Component and Molecular Function terms.

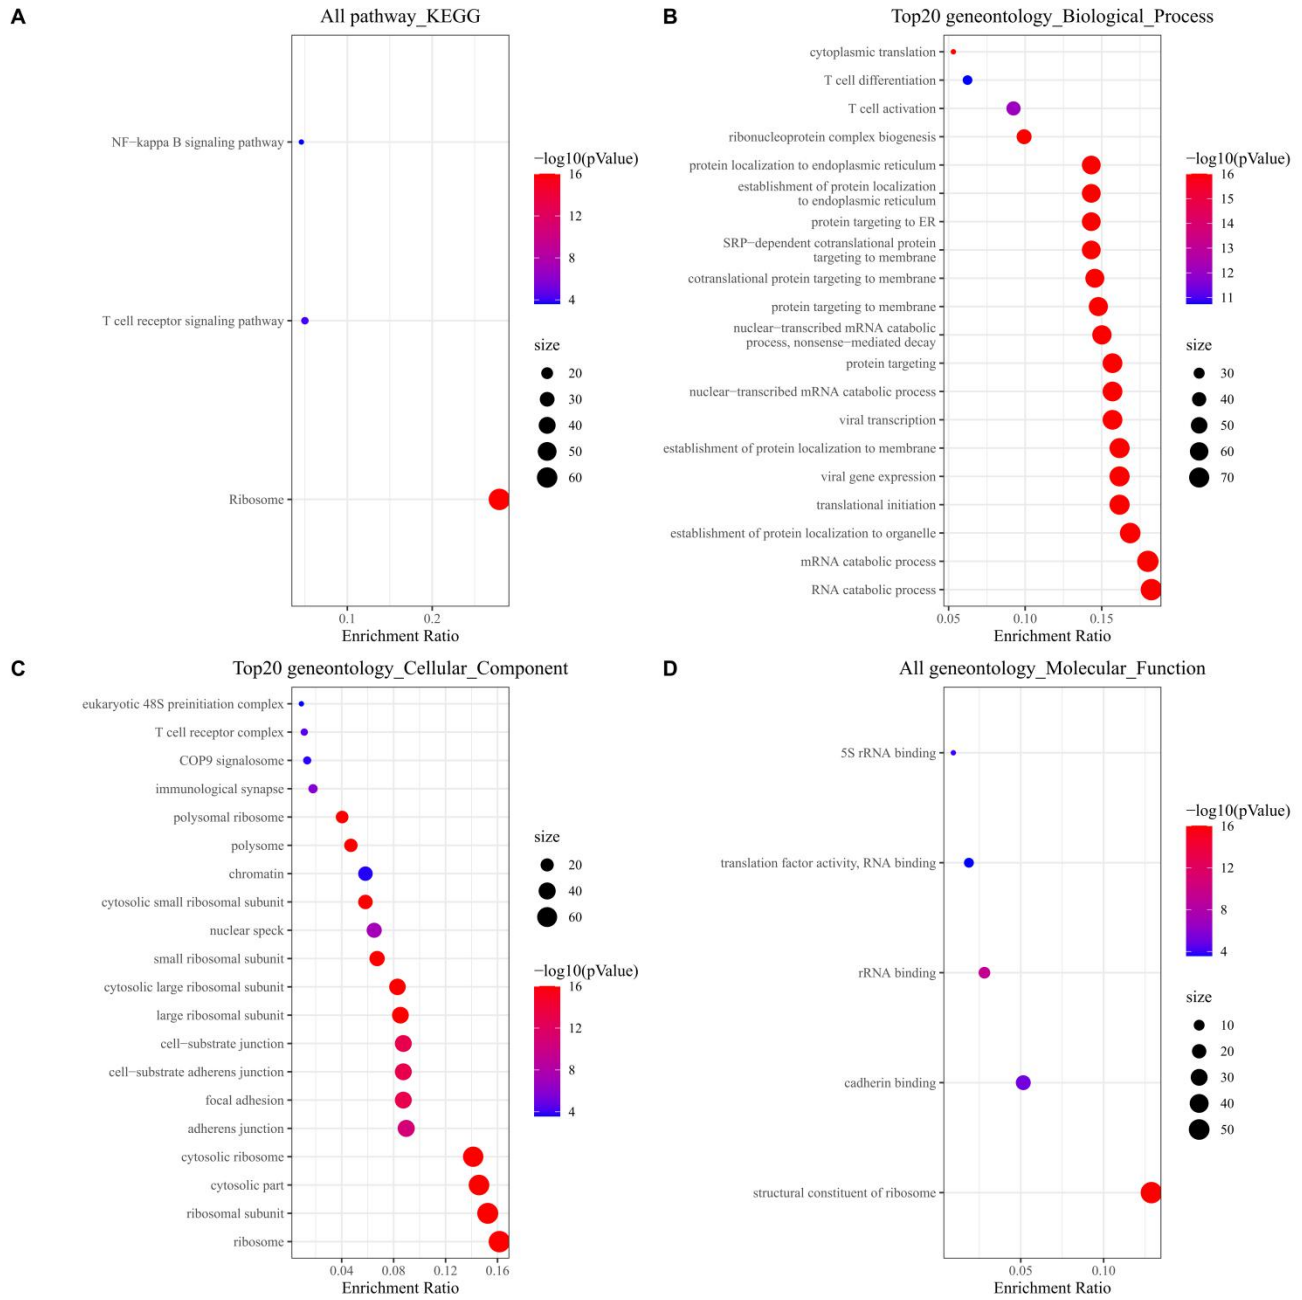

Supplementary Figure 4. GO and KEGG pathway enrichment analysis of the blue module.

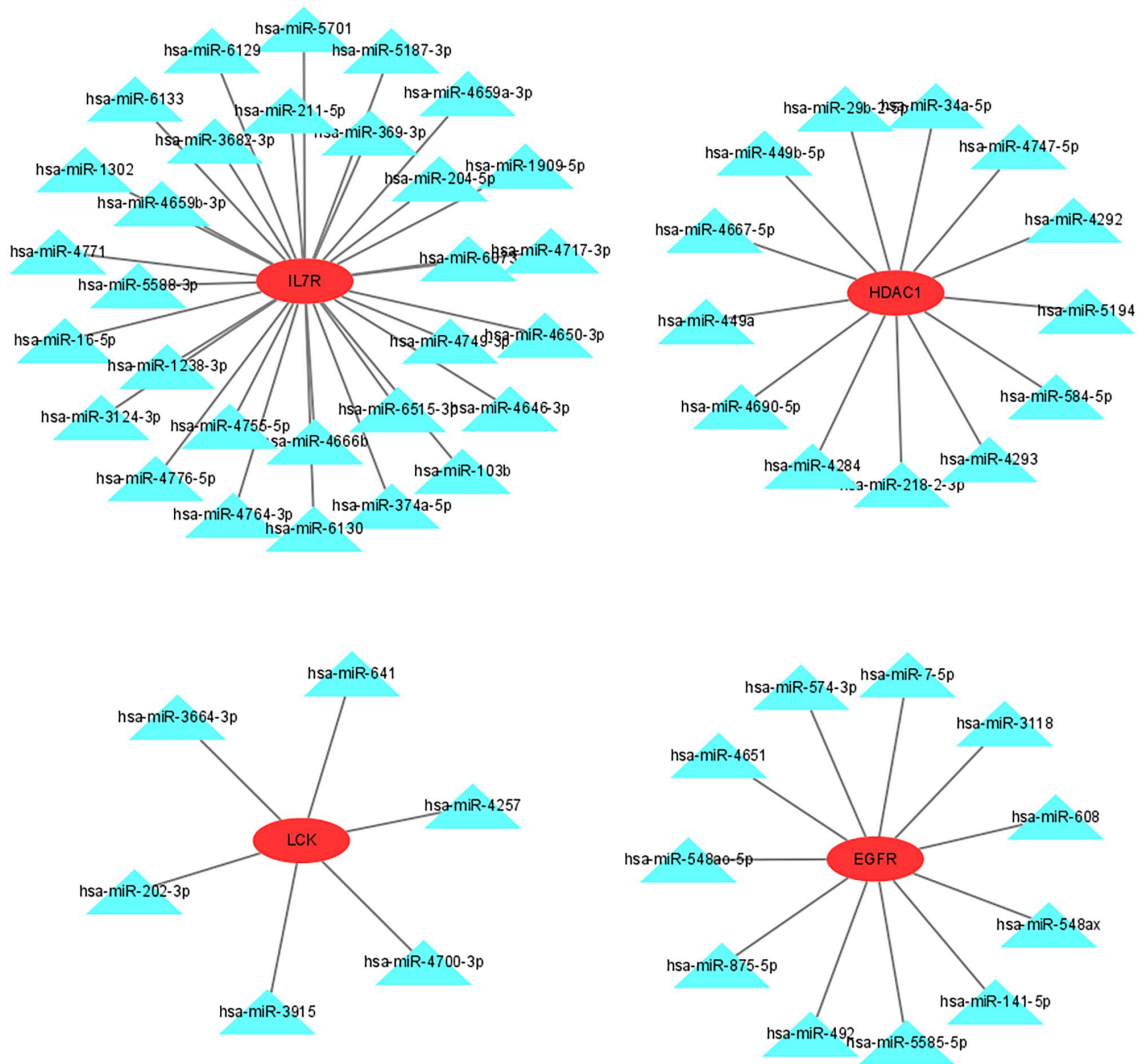

**Supplementary Figure 5.** The construction of the co-expressed network. Red ovals represent hub genes, and blue triangles represent the target mRNA-miRNA pairs
